# Supplementary material for: A green synthesis of nanocatalysts based on reduced graphene oxide/magnetic nanoparticles for the degradation of Acid Red 1
Source: Royal Society of Chemistry journal article supplement (doi:10.1039/d0ra06311h), 2020-01-01
Supplement: d0ra06311h1.pdf [file d0ra06311h1.pdf]

## SUPPORTING INFORMATION

*Fatemeh Sadegh<sup>a,b</sup>, Nikolaos Politakos<sup>a</sup>, Estibaliz González de San Román,<sup>a</sup> Oihane Sanz,<sup>c</sup> Iñigo Perez-Miqueo,<sup>c</sup> Sergio Enrique Moya,<sup>d</sup> Radmila Tomovska<sup>a,e\*</sup>*

<sup>a</sup>POLYMAT and Departamento de Química Aplicada, Facultad de Ciencias, Químicas, University of the Basque Country UPV/EHU, Joxe Mari Korta, Center - Avda. Tolosa, 72, 20018, San Sebastian, Spain

<sup>b</sup>Department of Chemistry, Faculty of Sciences, University of Sistan and Baluchestan, P.O. Box 98135 674, Zahedan, Iran.

<sup>c</sup>Departamento de Química Aplicada, Facultad de Ciencias, Químicas, University of the Basque Country, UPV/EHU, P.Manuel de Lardizabal 3, 20018, San Sebastian, Spain

<sup>d</sup>Center for Cooperative Research in Biomaterials (CIC biomaGUNE), Basque Research and Technology Alliance (BRTA), Paseo de Miramon 182, 20014 Donostia San Sebastián, Spain

<sup>e</sup>Ikerbasque, Basque Foundation for Science, Maria Diaz de Haro 3, 48013, Bilbao, Spain

\*corresponding author: radmila.tomovska@ehu.es

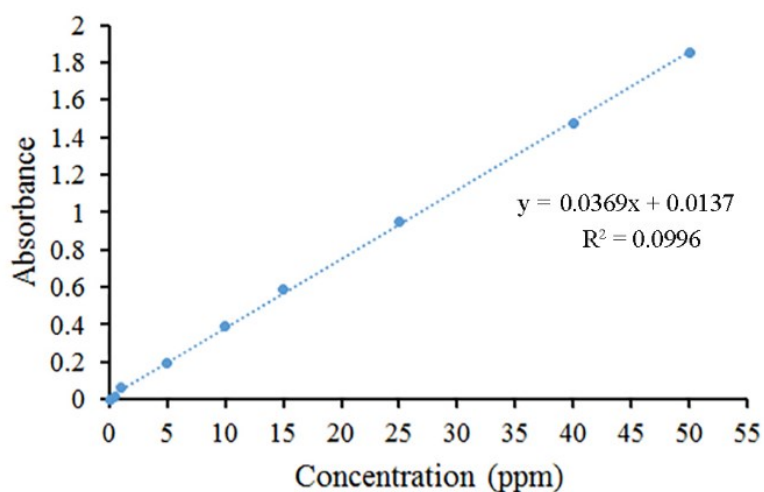

**Fig. S1** Calibration curve of Acid Red 1 dye.

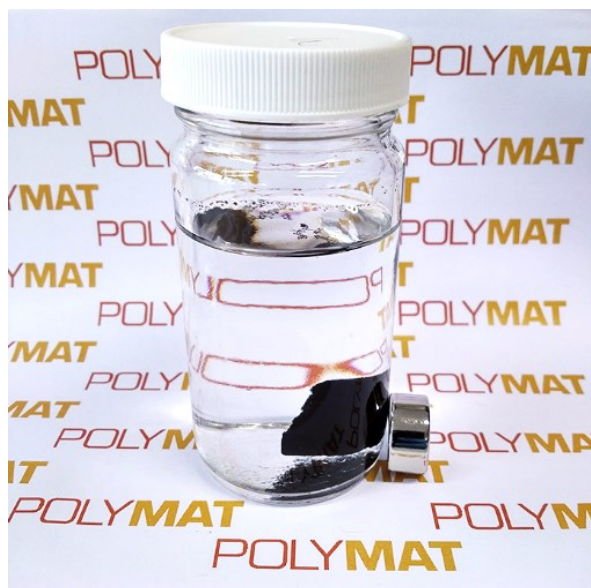

**Fig. S2** The 3D rGO@Fe<sub>3</sub>O<sub>4</sub> structure in the aqueous solution and in the presence of an external magnet.

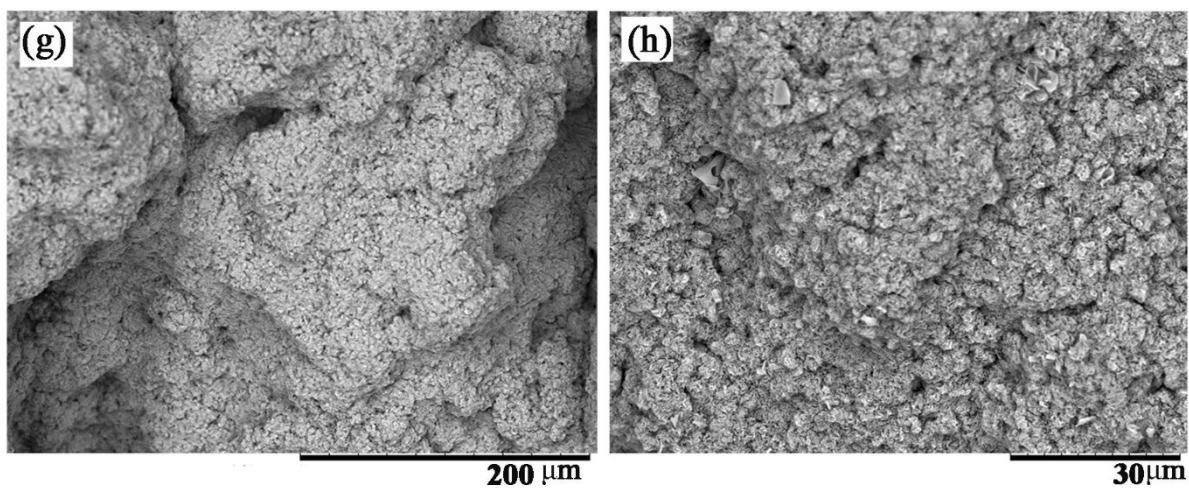

**Fig. S3** SEM Micrograph of oven-dried 3D rGO@Fe<sub>3</sub>O<sub>4</sub> under different magnification.

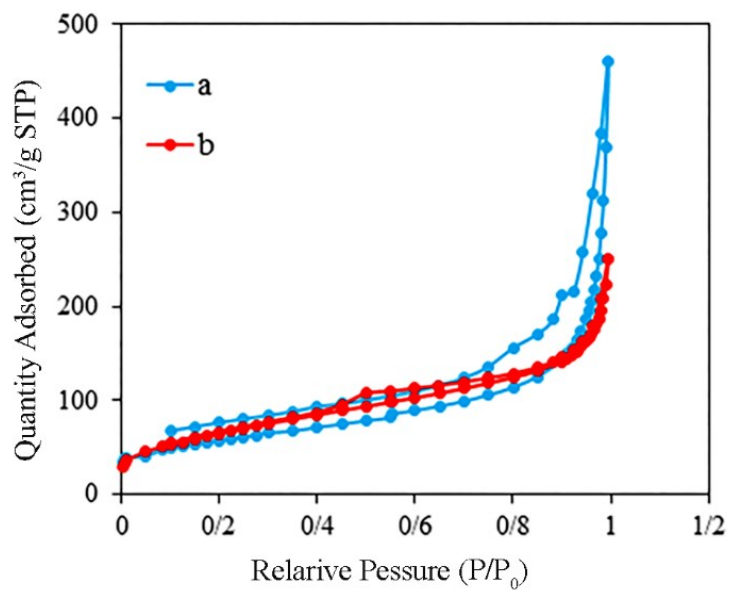

**Fig. S4** Nitrogen adsorption-desorption isotherms obtained at 77 K of **a)** blank, and **b)** 3D rGO@Fe<sub>3</sub>O<sub>4</sub> obtained at 77 K.

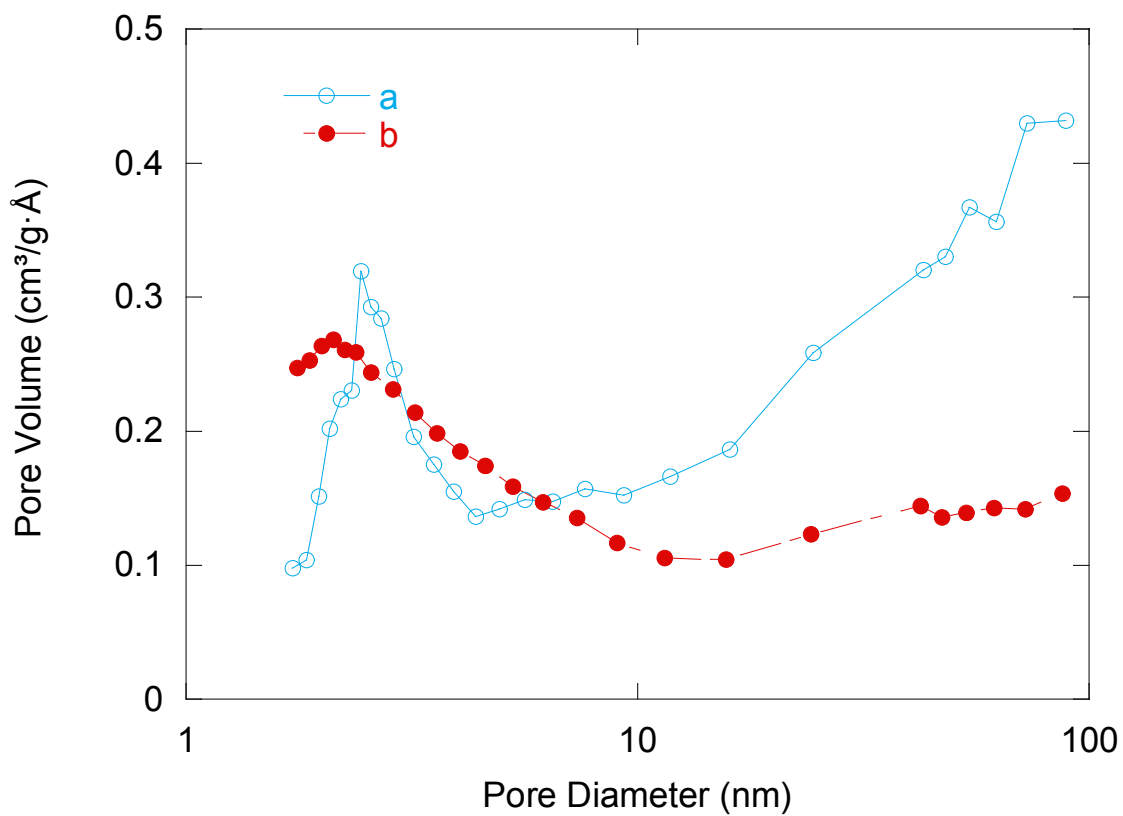

**Fig. S5** BET pore size distribution curves for **a)** blank, and **b)** 3D rGO@Fe<sub>3</sub>O<sub>4</sub>.
